# Supplementary material for: Identification of a Novel Myxoma Virus C7-Like Host Range Factor That Enabled a Species Leap from Rabbits to Hares
Source: PubMed Central journal article supplement (PMC9040879; doi:10.1128/mbio.03461-21), 2022-03-30

**vMyxTol-V5M159**

**+AraC**

**1hr**

**3hr**

**8hr**

**24hr**

**48hr**

**24hr**

**48hr**

V5 tagged M159

Actin

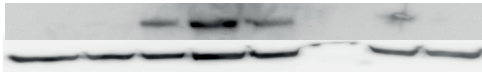

Supplement: mbio.03461-21-sf004.pdf [file mbio.03461-21-sf004.pdf]
