# Supplementary material for: Identification of a Novel Myxoma Virus C7-Like Host Range Factor That Enabled a Species Leap from Rabbits to Hares
Source: PubMed Central journal article supplement (PMC9040879; doi:10.1128/mbio.03461-21), 2022-03-30

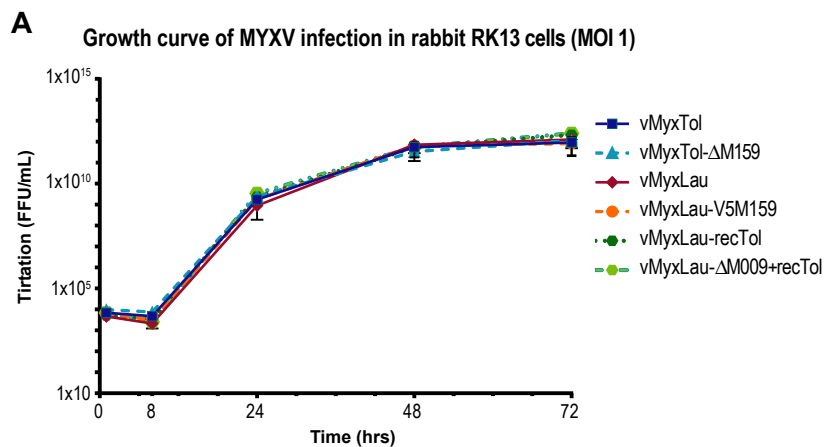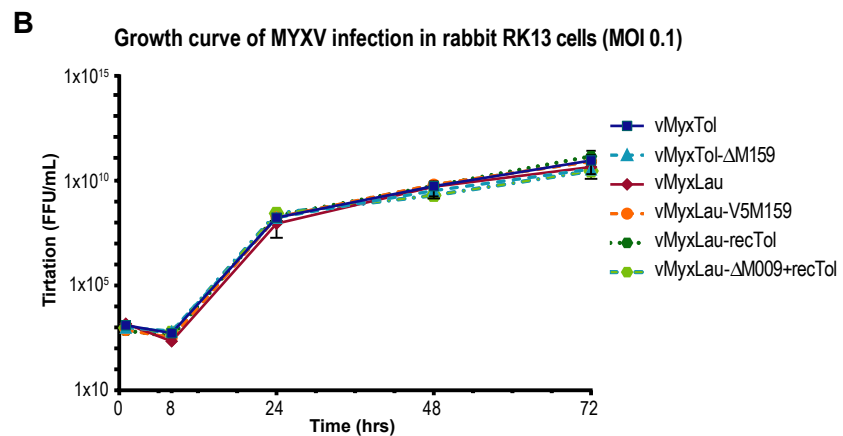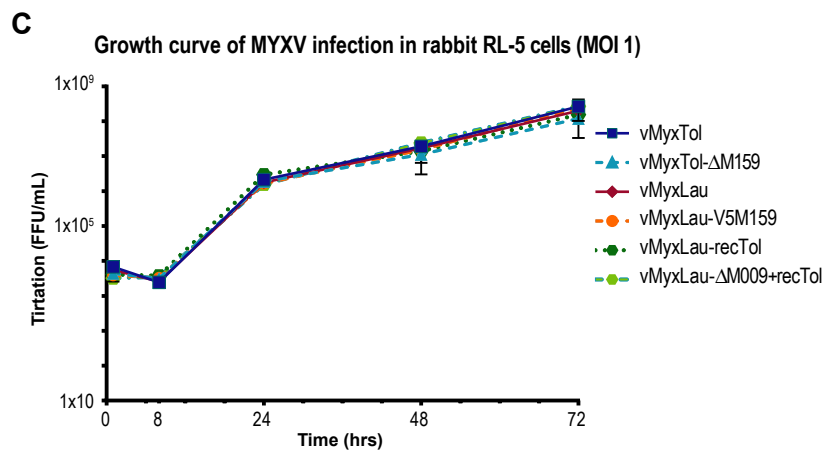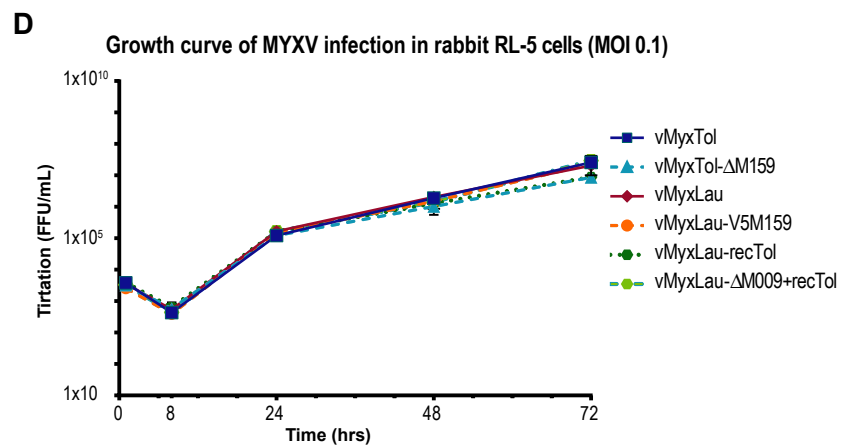

Supplement: mbio.03461-21-sf005.pdf [file mbio.03461-21-sf005.pdf]
